# Supplementary material
Source: ML conference proceedings conference paper supplement (https://openreview.net/forum?id=AYh9bA1tYg)
Supplement: supplementary_material [file attachment]

— Peor fitness - centro int. — Fitness medio - centro int. — Mejor fitness - centro int.

• Peor fitness - ancho int. • Fitness medio - ancho int. • Mejor fitness - ancho int.
