# Supplementary material
Source: ML conference proceedings conference paper supplement (https://openreview.net/forum?id=AYh9bA1tYg)
Supplement: supplementary_material [file attachment]

# Transformaciones disponibles

Primer paso

- 1 tti
- 2 indvars
- 3 gvn
- 4 tbaa
- ⋮ ...
- N inline

OPTIMIZACIÓN

PROGRAMA SOFTWARE  
HARDWARE ESPECÍFICO

Secuencia óptima de transformaciones (S)

N inline 2 indvars 3 gvn ⋮ ... 1 tti 1 tti

Segundo paso

OPTIMIZACIÓN

PROGRAMA SOFTWARE  
HARDWARE ESPECÍFICO

Subsecuencia óptima de transformaciones (B)

1 0 1 ... 1 1
